# Supplementary material for: An upper limit for water dimer absorption in the 750 nm spectral region and a revised water line list
Source: Copernicus journal article supplement (doi:10.5194/acp-11-4273-2011), 2011-05-09
Supplement: Supplementary file 1 [file Shillings paper readmefile v13Sept10.doc]

Readme file describing the file format for accompanying data:

An upper limit for water dimer absorption in the 750 nm spectral region and a revised water line list; A. J. L. Shillings, S. M. Ball, M. J. Barber, J. Tennyson and R. L. Jones.

[1] linelist.csv contains line parameters for 202236 water lines in the frequency range 750-20000cm-1 (with a minimum intensity cut-off of S = 10^-30 cm/molecule). The list is presented in HITRAN format which is fully described by Rothman et al. [J. Quant. Spectrosc. Radiat. Transf., 110, 533-572, 2009] and in Table 2 at http://badc.nerc.ac.uk/help/formats/hitran/

[2] linelist-long.csv; as above, but for approx 1.5 million lines with a minimum intensity cut-off of S = 10^-36 cm/molecule.

[3] templist.csv contains temperature dependent line strengths for the 59517 lines between 12750 and 20000cm-1 from the shorter line list [1]. Column 1 = line centre frequency (cm-1); Columns 2 to 4 = line strengths at 296 K, 323 K and 368 K respectively (cm molecule-1); Column 5 = self broadened width (cm-1 atm-1); Column 6 = H/B indicates whether the line data comes from HITRAN08 [Rothman et al., 2009] or Boris Voronin's work [J. Quant. Spectrosc. Radiat. Transf., 111, 2308-2314, doi:10.1016/j.jqsrt.2010.05.015, 2010].
